# Supplementary material for: The interaction between pain and attractiveness perception in others
Source: PubMed Central journal article supplement (PMC7099075; doi:10.1038/s41598-020-62478-x), 2020-03-26
Supplement: 41598_2020_62478_MOESM1_ESM.pdf [file 41598_2020_62478_MOESM1_ESM.pdf]

Supplementary materials for “The interaction between pain and attractiveness perception in others”

Jing Meng<sup>1,2,+</sup>, Xiong Li<sup>1,2,+</sup>, Weiwei Peng<sup>3, 4</sup>, Zuoshan Li<sup>1,2</sup>, and Lin Shen<sup>5\*</sup>

**S. Table 1.** Subjective ratings to different categories of facial stimuli (Mean  $\pm$  SD)

|                             | More attractive |                 | Less attractive |                 |
|-----------------------------|-----------------|-----------------|-----------------|-----------------|
|                             | Painful         | Non-painful     | Painful         | Non-painful     |
| <b>Pain intensity</b>       | 6.83 $\pm$ 0.20 | 6.77 $\pm$ 0.24 | 1.41 $\pm$ 0.13 | 1.50 $\pm$ 0.15 |
| <b>Attractiveness</b>       | 6.05 $\pm$ 0.47 | 3.60 $\pm$ 0.29 | 6.14 $\pm$ 0.42 | 3.67 $\pm$ 0.50 |
| <b>Emotional valence</b>    | 3.41 $\pm$ 0.16 | 3.17 $\pm$ 0.16 | 4.17 $\pm$ 0.23 | 3.39 $\pm$ 0.24 |
| <b>Arousal</b>              | 2.95 $\pm$ 0.23 | 2.50 $\pm$ 0.17 | 3.10 $\pm$ 0.22 | 2.45 $\pm$ 0.18 |
| <b>Emotional appearance</b> | 4.78 $\pm$ 0.52 | 5.03 $\pm$ 0.25 | 4.67 $\pm$ 0.53 | 4.96 $\pm$ 0.21 |

Notes: Statistics were obtained using Paired-Samples T test of Emotional appearance with “attractive” (More attractive vs. Less attractive) for non-painful pictures. No significant difference was observed between the more attractive (5.03  $\pm$  0.25) and less attractive (4.96  $\pm$  0.21) non-painful pictures ( $t(29)=2.015, p =0.053$ ).

S. **Table 2.** Summary of statistical analysis of the factor for “order”

|                               | Pain Judgment Task Order | More attractive non-painful |      |     | More attractive painful |      |      | Less attractive non-painful |     |     | Less attractive painful |     |     |
|-------------------------------|--------------------------|-----------------------------|------|-----|-------------------------|------|------|-----------------------------|-----|-----|-------------------------|-----|-----|
|                               |                          | Mean±SD                     | t    | p   | Mean±SD                 | t    | p    | Mean±SD                     | t   | p   | Mean±SD                 | t   | p   |
| <b>Behavioral data</b>        |                          |                             |      |     |                         |      |      |                             |     |     |                         |     |     |
| <b>Pain intensity ratings</b> | First                    | 1.83±1.15                   | -0.6 | 0.4 | 5.42±1.42               | -0.6 | 0.54 | 1.98±1.17                   | -0. | 0.6 | 5.67±1.24               | 0.1 | 0.9 |
|                               | Second                   | 2.11±1.28                   | 9    | 96  | 5.71±1.38               | 2    | 0    | 2.16±1.27                   | 42  | 77  | 5.62±1.46               | 0   | 23  |
| <b>Attractiveness ratings</b> | First                    | 4.51±0.93                   | -1.3 | 0.1 | 5.51±1.00               | -0.7 | 0.48 | 5.17±0.73                   | -0. | 0.3 | 5.87±0.81               | -0. | 0.8 |
|                               | Second                   | 4.86±0.51                   | 6    | 82  | 5.71±0.71               | 1    | 5    | 5.35±0.42                   | 86  | 94  | 5.92±0.66               | 19  | 48  |
| <b>Emotional reactions</b>    | First                    | 6.14±0.87                   | 0.4  | 0.6 | 5.75±0.89               | 0.53 | 0.60 | 3.81±0.91                   | -0. | 0.7 | 3.60±0.73               | 0.0 | 0.9 |
|                               | Second                   | 6.00±1.10                   | 0    | 89  | 5.55±1.32               | 0    | 0    | 3.92±1.18                   | 34  | 38  | 3.59±0.95               | 6   | 55  |
| <b>RTs (ms)</b>               | First                    | 760.74±32                   |      |     | 777.90±27               |      |      | 757.37±28                   |     |     | 757.02±283              |     |     |
|                               |                          | 2.60                        | -0.6 | 0.4 | 8.07                    | -0.6 | 0.54 | 9.80                        | -0. | 0.5 | .51                     | -0. | 0.3 |
| <b>ACCs</b>                   | First                    | 835.43±32                   | 9    | 98  | 838.78±30               | 1    | 3    | 821.71±31                   | 63  | 31  | 854.86±327              | 95  | 51  |
|                               | Second                   | 1.53                        |      |     | 8.40                    |      |      | 1.18                        |     |     | .20                     |     |     |
| <b>ACCs</b>                   | First                    | 0.91±0.16                   | 0.7  | 0.4 | 0.88±0.22               | -0.0 | 0.99 | 0.91±0.17                   | 0.1 | 0.8 | 0.89±0.20               | 0.6 | 0.5 |
|                               | Second                   | 0.87±0.21                   | 7    | 46  | 0.88±0.20               | 1    | 6    | 0.90±0.15                   | 7   | 70  | 0.84±0.25               | 2   | 39  |
| <b>ERP data</b>               |                          |                             |      |     |                         |      |      |                             |     |     |                         |     |     |
| <b>N1</b>                     | First                    | -2.39±2.90                  | 1.7  | 0.0 | -3.09±3.31              | 1.05 | 0.30 | -2.99±3.04                  | 1.3 | 0.1 | -2.94±2.95              | 1.4 | 0.1 |
|                               | Second                   | -4.52±4.32                  | 2    | 94  | -4.48±4.40              | 0    | 0    | -4.67±4.15                  | 7   | 79  | -4.87±4.67              | 7   | 51  |
| <b>N170</b>                   | First                    | 0.99±3.33                   | -0.3 | 0.7 | 0.76±3.45               | -0.4 | 0.67 | 1.06±3.56                   | -0. | 0.9 | 0.76±3.74               | -0. | 0.5 |
|                               | Second                   | 1.43±4.43                   | 4    | 38  | 1.31±4.15               | 3    | 2    | 1.19±4.14                   | 10  | 18  | 1.56±4.31               | 59  | 61  |
| <b>P2</b>                     | First                    | 5.29±3.26                   | -0.2 | 0.8 | 4.80±3.21               | -0.7 | 0.47 | 5.13±3.24                   | -0. | 0.7 | 5.08±3.25               | -0. | 0.4 |
|                               | Second                   | 5.59±3.69                   | 5    | 03  | 5.60±3.38               | 2    | 6    | 5.47±3.48                   | 30  | 64  | 5.99±3.32               | 82  | 18  |
| <b>N2</b>                     | First                    | -2.17±5.00                  | -0.2 | 0.7 | -3.25±4.62              | -0.7 | 0.48 | -2.94±4.69                  | -0. | 0.4 | -3.30±4.28              | -0. | 0.4 |
|                               | Second                   | -1.65±5.62                  | 9    | 73  | -2.02±5.79              | 0    | 9    | -1.53±5.47                  | 82  | 19  | -1.82±6.07              | 84  | 09  |
| <b>P3</b>                     | First                    | 7.31±4.05                   | 0.0  | 0.9 | 6.51±4.59               | -0.6 | 0.52 | 6.51±4.28                   | -0. | 0.8 | 6.90±4.13               | -0. | 0.5 |
|                               | Second                   | 7.22±3.06                   | 76   | 40  | 7.39±3.46               | 4    | 5    | 6.72±3.21                   | 17  | 68  | 7.67±3.42               | 60  | 54  |
| <b>LPC</b>                    | First                    | 7.16±4.02                   | -0.4 | 0.6 | 6.84±4.85               | -0.5 | 0.56 | 6.52±4.14                   | -0. | 0.8 | 7.04±4.36               | -0. | 0.8 |
|                               | Second                   | 7.66±3.09                   | 2    | 79  | 7.65±3.22               | 8    | 7    | 6.71±2.79                   | 16  | 73  | 7.24±2.63               | 16  | 76  |

Notes: Statistics were obtained using Independent-Samples T test with the between-participant variable of “order” (Pain Judgment Task first vs. Pain Judgment second). None significant comparisons were found in all dependent variables (all  $p > 0.05$ ).  $N_{\text{Pain Judgment Task first}} = 18$ ,  $N_{\text{Pain Judgment Task second}} = 17$ ,  $df:(33)$

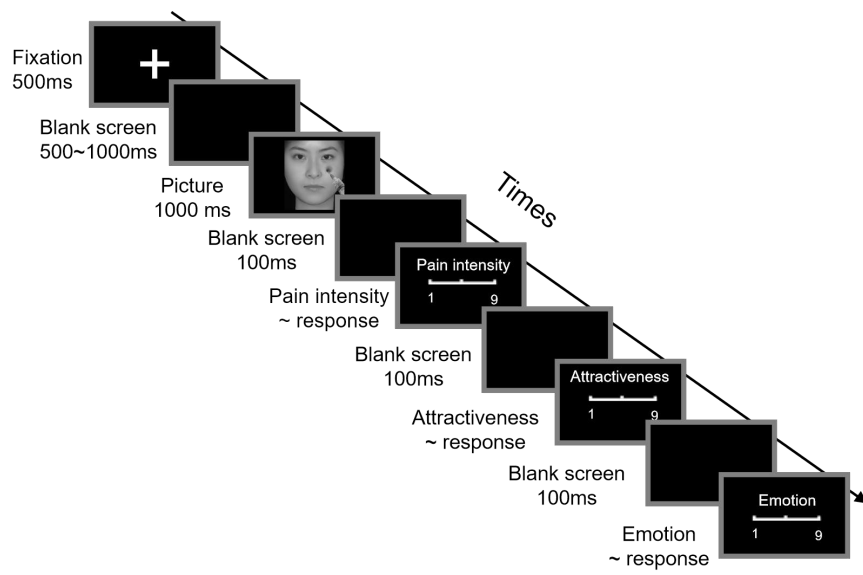

**S. Figure 1.** Flowchart describing the experimental design of measurement of subjective reports
